# Supplementary figures and images for: Electronic structures of blue copper centers of amicyanin and azurin in the solution state
Source: Royal Society of Chemistry journal article supplement (doi:10.1039/d4dt02891k), 2024-12-12

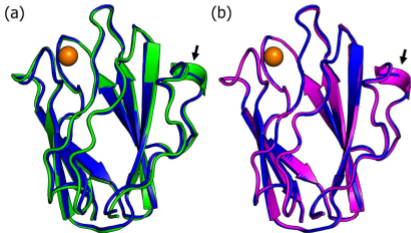

Supplement: d4dt02891k2.pdf [file d4dt02891k2.pdf]

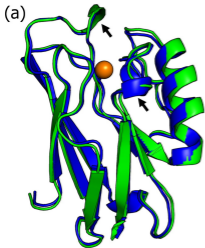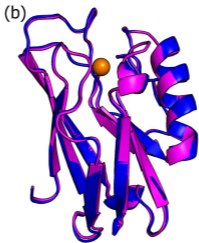

Supplement: d4dt02891k3.pdf [file d4dt02891k3.pdf]

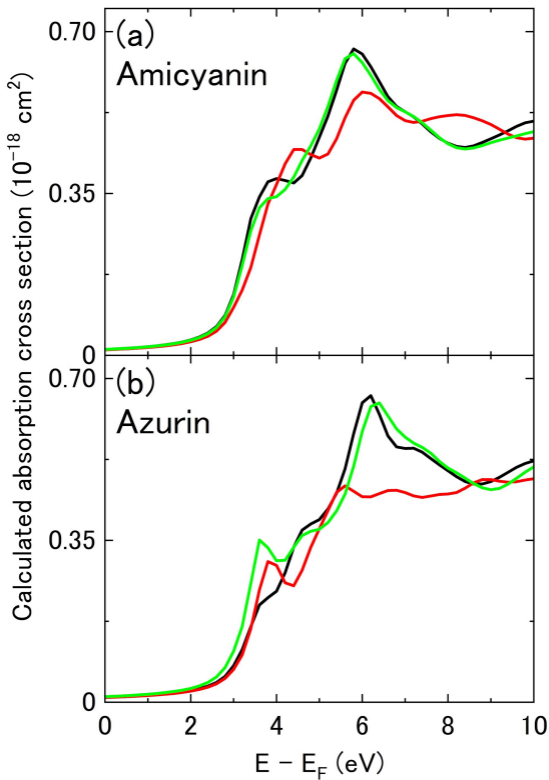

Supplement: d4dt02891k4.pdf [file d4dt02891k4.pdf]

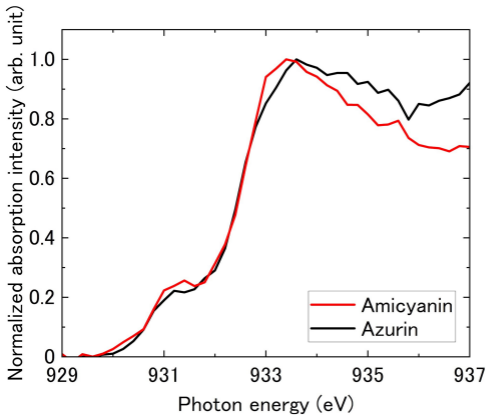

Supplement: d4dt02891k5.pdf [file d4dt02891k5.pdf]
